# Supplementary material for: Moderate Red Wine Consumption Increases the Expression of Longevity-Associated Genes in Controlled Human Populations and Extends Lifespan in Drosophila melanogaster
Source: PubMed Central journal article supplement (PMC7920262; doi:10.3390/antiox10020301), 2021-02-16
Supplement: antioxidants-10-00301-s001.pdf [file antioxidants-10-00301-s001.pdf]

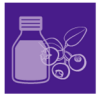

# Supplementary Materials: Moderate Red Wine Consumption Increases the Expression of Longevity-associated Genes in Controlled Human Populations and Extends Lifespan in *Drosophila melanogaster*

Juan Gambini <sup>1</sup>, Lucia Gimeno-Mallench <sup>1</sup>, Gloria Olaso-Gonzalez <sup>1</sup>, Angela Mastaloudis <sup>2</sup>, Maret G. Traber <sup>2</sup>, Daniel Monleón <sup>3</sup>, Consuelo Borrás <sup>1,\*</sup> and Jose Viña <sup>1</sup>

<sup>1</sup> Freshage Research Group, Department of Physiology, Faculty of Medicine, University of Valencia, CIBER-FES-ISCI, INCLIVA, E46010 Valencia, Spain; juan.gambini@uv.es (J.G.); lucia.gimeno@uv.es (L.G.-M.); gloria.olaso@uv.es (G.O.-G.); jose.vina@uv.es (J.V.)

<sup>2</sup> Linus Pauling Institute, Oregon State University, Corvallis, OR 97331-6512, USA; mastaloudis@gmail.com (A.M.); maret.traber@oregonstate.edu (M.G.T.)

<sup>3</sup> Department of Pathology, Faculty of Medicine, University of Valencia, CIBERFES-ISCI, INCLIVA, E46010 Valencia, Spain; daniel.monleon@uv.es

\* Correspondence: consuelo.borras@uv.es; Tel.: +34 963864646; Fax: +34963864642

**Table S1.** Longevity-associated genes whose expression is not affected by moderate wine consumption. Data are expressed as concentration means  $\pm$  SD (Molar\*10<sup>-5</sup>) of 9 different people.

|               | Before            | After            | $\Delta\%$    | <i>p</i> |
|---------------|-------------------|------------------|---------------|----------|
| <b>AKT1</b>   | 24 $\pm$ 10       | 27 $\pm$ 13      | 115 $\pm$ 24  | 0.288    |
| <b>CDKN2A</b> | 0.19 $\pm$ 0.13   | 0.23 $\pm$ 0.09  | 170 $\pm$ 99  | 0.202    |
| <b>FOXO3</b>  | 6.4 $\pm$ 4.0     | 4.9 $\pm$ 3.2    | 86 $\pm$ 51   | 0.184    |
| <b>FRAP1</b>  | 4.0 $\pm$ 2.1     | 3.0 $\pm$ 0.9    | 89 $\pm$ 41   | 0.088    |
| <b>IRS1</b>   | 0.043 $\pm$ 0.046 | 0.085 $\pm$ 0.80 | 273 $\pm$ 257 | 0.105    |
| <b>SESN2</b>  | 3.4 $\pm$ 2.3     | 3.9 $\pm$ 2.5    | 135 $\pm$ 61  | 0.346    |
| <b>TERF1</b>  | 0.05 $\pm$ 0.03   | 0.05 $\pm$ 0.04  | 164 $\pm$ 139 | 0.426    |
| <b>TERF2</b>  | 8.0 $\pm$ 4.6     | 7.9 $\pm$ 4.21   | 112 $\pm$ 68  | 0.487    |
| <b>TERT</b>   | 3.9 $\pm$ 7.5     | 1.9 $\pm$ 1.2    | 232 $\pm$ 296 | 0.237    |

**Table S2.** Lack of effect of moderate red wine consumption on vitamin E, lipid peroxidation or biomarkers of inflammation. Data are expressed as means  $\pm$  SD n=4 before and after wine consumption. Urinary markers are expressed per g creatinine which was not different between the two treatment periods.

|                                                              | Before          | After            | <i>p</i> |
|--------------------------------------------------------------|-----------------|------------------|----------|
| <b>Plasma</b>                                                |                 |                  |          |
| <b>Gamma-Tocopherol (<math>\mu</math>M)</b>                  | 0.93 $\pm$ 0.14 | 0.84 $\pm$ 0.18  | 0.228    |
| <b>Alpha-Tocopherol (<math>\mu</math>M)</b>                  | 17.9 $\pm$ 2.7  | 17.1 $\pm$ 4.0   | 0.476    |
| <b>Urine</b>                                                 |                 |                  |          |
| <b>Gamma-CEHC (<math>\mu</math>mol/g Creat)</b>              | 0.73 $\pm$ 0.10 | 0.54 $\pm$ 0.20  | 0.21     |
| <b>Alfa-CEHC (<math>\mu</math>mol/g Creat)</b>               | 2.37 $\pm$ 0.67 | 2.30 $\pm$ 0.40  | 0.86     |
| <b>PGF2a related (<math>\mu</math>g/g creat.)</b>            | 2.20 $\pm$ 0.44 | 2.58 $\pm$ 0.852 | 0.995    |
| <b>2.3-dinor-F1 metabolites (<math>\mu</math>g/g creat.)</b> | 6.2 $\pm$ 2.2   | 17.8 $\pm$ 11.4  | 0.156    |
| <b>2.3-dinor-F2 metabolites (<math>\mu</math>g/g creat.)</b> | 55.4 $\pm$ 17.3 | 63.3 $\pm$ 25.7  | 0.853    |

**Table S3. Relative contribution of selected metabolic spectral clusters to overall metabolic content.** The value corresponds to the ratio between selected spectral region (labeled as most probable metabolite assignment) and total spectral aliphatic area. The ratio has been multiplied by 1000 for easier readability.

| Spectral region metabolite assignment                      | Before intervention |      | After intervention |      | P-value |
|------------------------------------------------------------|---------------------|------|--------------------|------|---------|
|                                                            | Mean                | Std  | Mean               | Std  |         |
| 2-hydroxyvalerate                                          | 8.11                | 0.49 | 9.76               | 2.57 | 0.301   |
| 2-hydroxyvalerate + FFAA $\beta$ CH <sub>2</sub>           | 19.42               | 0.50 | 20.47              | 1.20 | 0.192   |
| acetoacetate                                               | 9.14                | 0.12 | 9.95               | 0.49 | 0.025   |
| alanine                                                    | 4.05                | 0.22 | 4.81               | 1.10 | 0.272   |
| alloisoleucine + 2-hydroxyvalerate                         | 9.99                | 0.31 | 9.88               | 0.33 | 0.674   |
| cholesterol                                                | 46.57               | 2.91 | 44.20              | 3.02 | 0.329   |
| cholesterol + FFAA (-CH <sub>3</sub> )                     | 19.60               | 0.44 | 20.42              | 0.70 | 0.113   |
| choline + TMA                                              | 4.62                | 0.07 | 4.92               | 0.21 | 0.049   |
| citrate                                                    | 2.49                | 0.11 | 8.86               | 5.43 | 0.078   |
| creatine + glucose                                         | 5.51                | 0.36 | 6.90               | 2.01 | 0.270   |
| creatinine                                                 | 3.59                | 0.18 | 4.38               | 1.27 | 0.311   |
| cysteine                                                   | 8.93                | 0.53 | 10.22              | 2.10 | 0.326   |
| cysteine + lysine                                          | 3.63                | 0.11 | 3.63               | 0.17 | 0.982   |
| cysteine + creatinine                                      | 4.92                | 0.23 | 5.15               | 0.47 | 0.451   |
| FFAA (=CH-CH <sub>2</sub> -CH=)                            | 17.68               | 0.48 | 19.88              | 3.85 | 0.351   |
| FFAA (=CH-CH <sub>2</sub> -CH=) + malate                   | 0.32                | 0.01 | 0.70               | 0.38 | 0.127   |
| FFAA (=CH-CH <sub>2</sub> -CH <sub>2</sub> -)              | 2.70                | 0.06 | 2.77               | 0.15 | 0.452   |
| FFAA (=CH-CH <sub>2</sub> -CH <sub>2</sub> -) + isoleucine | 6.27                | 0.12 | 6.72               | 0.53 | 0.183   |
| FFAA (-CH <sub>2</sub> ) <sub>n</sub>                      | 28.01               | 0.17 | 26.67              | 1.01 | 0.054   |
| FFAA (-CH <sub>2</sub> ) <sub>n</sub> + isoleucine         | 82.28               | 3.50 | 84.98              | 4.89 | 0.438   |
| FFAA (-CH <sub>3</sub> )                                   | 51.11               | 1.64 | 49.17              | 2.39 | 0.261   |
| FFAA (-CH <sub>3</sub> ) + valerate                        | 56.82               | 1.06 | 58.37              | 1.42 | 0.154   |
| FFAA $\beta$ CH <sub>2</sub>                               | 9.26                | 0.15 | 9.56               | 0.29 | 0.150   |
| FFAA $\alpha$ CH <sub>2</sub> + valerate                   | 6.36                | 0.08 | 6.57               | 0.26 | 0.200   |
| glucose + glycine                                          | 3.52                | 0.10 | 3.87               | 0.27 | 0.067   |
| glucose + lysine                                           | 3.88                | 0.20 | 4.52               | 0.90 | 0.258   |
| glucose + TMAO                                             | 3.16                | 0.29 | 3.65               | 0.67 | 0.262   |
| glutamine                                                  | 11.43               | 0.42 | 11.81              | 0.90 | 0.515   |
| isobutyrate + glutamine                                    | 5.33                | 0.18 | 5.71               | 0.45 | 0.200   |
| isobutyrate + malate                                       | 3.40                | 0.11 | 3.57               | 0.29 | 0.368   |
| isoleucine + leucine                                       | 37.96               | 0.71 | 36.55              | 0.64 | 0.028   |
| lactato                                                    | 2.90                | 0.11 | 3.30               | 0.79 | 0.398   |
| leucine                                                    | 4.81                | 0.16 | 4.84               | 0.22 | 0.868   |
| leucine + 2-hydroxyvalerate                                | 22.55               | 0.76 | 22.67              | 1.08 | 0.867   |
| leucine + alloisoleucine                                   | 11.72               | 0.28 | 11.30              | 0.34 | 0.118   |
| leucine + glucose                                          | 1.91                | 0.05 | 2.13               | 0.32 | 0.261   |
| leucine + lysine                                           | 20.80               | 0.81 | 20.81              | 0.98 | 0.987   |
| lysine                                                     | 26.47               | 0.78 | 26.20              | 0.92 | 0.694   |
| malate                                                     | 8.46                | 0.80 | 10.24              | 2.67 | 0.294   |
| malate + proline                                           | 1.99                | 0.07 | 2.10               | 0.19 | 0.370   |
| prolina + lactato                                          | 11.53               | 0.38 | 12.89              | 2.84 | 0.431   |
| proline + alloisoleucine                                   | 13.54               | 0.65 | 13.92              | 0.97 | 0.575   |
| proline + glucose                                          | 9.44                | 0.23 | 10.07              | 0.42 | 0.051   |
| taurine1                                                   | 9.44                | 0.26 | 10.07              | 0.47 | 0.043   |
| taurine2                                                   | 2.04                | 0.05 | 2.14               | 0.11 | 0.183   |
| threonine                                                  | 11.62               | 0.94 | 13.71              | 3.51 | 0.342   |
| unknown1                                                   | 3.53                | 0.08 | 3.93               | 0.60 | 0.286   |
| valerate                                                   | 5.45                | 0.11 | 5.52               | 0.28 | 0.674   |
| valine                                                     | 20.15               | 0.60 | 22.04              | 3.16 | 0.332   |
| valine + FFAA $\alpha$ CH <sub>2</sub>                     | 17.81               | 0.39 | 25.14              | 8.07 | 0.153   |

Keys: FFAA, fatty acids; TMA, trimethylamines; TMAO, trimethylamine-oxide.

**Table S4. General biochemical and clinical parameters.** Data are expressed as means  $\pm$  SD of 9 different people. The statistical significance is expressed as \*P < 0.05 or \*\*P < 0.01 vs. control.

|                                  | Before            | After              | P       |
|----------------------------------|-------------------|--------------------|---------|
| <b>Leucocytes</b>                | 4.88 $\pm$ 0.68   | 4.83 $\pm$ 0.74    | 0.460   |
| <b>Red cells</b>                 | 4.39 $\pm$ 0.17   | 4.25 $\pm$ 0.20    | 0.166   |
| <b>Hemoglobin</b>                | 13.2 $\pm$ 0.5    | 13.1 $\pm$ 0.6     | 0.400   |
| <b>Hematocrite</b>               | 41.1 $\pm$ 1.4    | 40.4 $\pm$ 2.1     | 0.285   |
| <b>Average cor. vol.</b>         | 93.6 $\pm$ 1.7    | 95.0 $\pm$ 1.4     | 0.126   |
| <b>Average cor. HB</b>           | 30.1 $\pm$ 0.6    | 30.9 $\pm$ 0.4*    | 0.039   |
| <b>Average cor. [HB]</b>         | 32.2 $\pm$ 0.2    | 32.5 $\pm$ 0.5     | 0.101   |
| <b>Wide distribution hematie</b> | 13.7 $\pm$ 0.4    | 14.2 $\pm$ 0.5     | 0.071   |
| <b>Platelets</b>                 | 208 $\pm$ 56      | 263 $\pm$ 27       | 0.065   |
| <b>MPV</b>                       | 11.2 $\pm$ 1.5    | 11.3 $\pm$ 1.5     | 0.464   |
| <b>Immature neutrophils</b>      | 0.039 $\pm$ 0.023 | 0.048 $\pm$ 0.005  | 0.251   |
| <b>Segmented neutrophils</b>     | 2.60 $\pm$ 0.44   | 2.65 $\pm$ 0.54    | 0.451   |
| <b>Basophils</b>                 | 0.015 $\pm$ 0.006 | 0.023 $\pm$ 0.001  | 0.114   |
| <b>Eosinophils</b>               | 0.16 $\pm$ 0.06   | 0.15 $\pm$ 0.07    | 0.400   |
| <b>Lymphocytes</b>               | 1.63 $\pm$ 0.30   | 1.55 $\pm$ 0.29    | 0.350   |
| <b>Monocytes</b>                 | 0.43 $\pm$ 0.05   | 0.32 $\pm$ 0.20    | 0.160   |
| <b>Reticulocytes</b>             | 40.3 $\pm$ 19.7   | 50.7 $\pm$ 21.0    | 0.249   |
| <b>Glucose</b>                   | 77.8 $\pm$ 6.7    | 77.2 $\pm$ 10.5    | 0.463   |
| <b>Total cholesterol</b>         | 228 $\pm$ 15      | 242 $\pm$ 33       | 0.241   |
| <b>HDL</b>                       | 74.7 $\pm$ 4.2    | 88.4 $\pm$ 4.8**   | 0.0026  |
| <b>LDL</b>                       | 135 $\pm$ 10      | 136 $\pm$ 27       | 0.468   |
| <b>Triglicerides</b>             | 91.2 $\pm$ 57     | 84.5 $\pm$ 37      | 0.424   |
| <b>Total proteins</b>            | 7.23 $\pm$ 0.34   | 7.23 $\pm$ 0.28    | 0.500   |
| <b>Alfa 1 glicoprot ac.</b>      | 56.8 $\pm$ 6.3    | 95.8 $\pm$ 9.1**   | 0.00020 |
| <b>PCR</b>                       | 0.125 $\pm$ 0.066 | 0.143 $\pm$ 0.060  | 0.355   |
| <b>Insuline</b>                  | 4.94 $\pm$ 2.29   | 5.87 $\pm$ 2.90    | 0.317   |
| <b>Albumin</b>                   | 4.35 $\pm$ 0.01   | 4.20 $\pm$ 0.18    | 0.067   |
| <b>Afla 1 globulin</b>           | 0.222 $\pm$ 0.038 | 0.230 $\pm$ 0.029  | 0.382   |
| <b>Afla 2 globulin</b>           | 0.653 $\pm$ 0.099 | 0.753 $\pm$ 0.0112 | 0.115   |
| <b>Beta globuline</b>            | 0.803 $\pm$ 0.118 | 0.788 $\pm$ 0.123  | 0.433   |
| <b>Gamma globuline</b>           | 0.955 $\pm$ 0.570 | 1.27 $\pm$ 0.15    | 0.167   |
| <b>Albumine/globuline</b>        | 1.53 $\pm$ 0.17   | 1.40 $\pm$ 0.17    | 0.163   |
